# Supplementary material for: Cognitive Function, Healthy Diet, and All-Cause Mortality among Chinese Older Adults: A Longitudinal Prospective Study
Source: Preprints.org preprint supplement (doi:10.20944/preprints202404.0345.v1), 2024-04-04
Supplement: Supplementary file 1 [file supplementary]

# Supplementary material

**Table S1. Adjusted HRs* and 95% CIs for the MMSE scores with all-cause mortality, stratified by lifestyle behaviors**

| Lifestyle behaviors |  | HR (95% CI)  for 1-point increase | *P* for interaction | |
| --- | --- | --- | --- | --- |
| Smoking status | Unhealthy | 0.970 (0.955-0.984) | 0.121 |
|  | Healthy | 0. 961 (0.952-0.970) |  |
| Alcohol consumption | Unhealthy | 0. 965 (0.950-0.979) | 0.783 |
|  | Healthy | 0. 963 (0.954-0.972) |  |
| Physical activity | Unhealthy | 0. 964 (0.955-0.974) | 0.983 |
|  | Healthy | 0. 962 (0.950-0.975) |  |
| Diet | Unhealthy | 0. 969 (0.959-0.979) | 0.003 |
|  | Healthy | 0. 956 (0.944-0.967) |  |
| BMI | Unhealthy | 0. 970 (0.959-0.981) | 0.189 |
|  | Healthy | 0. 956 (0.946-0.967) |  |

* Adjusted for age, sex, education, residence, marital status, living pattern, self-rated of economic status, ADL in disability, and history of chronic disease (diabetes, heart diseases, cancer and stroke). MMSE, Mini-Mental State Examination; HR, hazard ratio; CI, confidence interval; ADL, activities of daily living; BMI, body mass index.

Figure S1. Flow chart of the included CLHLS participants

2117 participants were excluded:

- 3699 participants lost to follow-up or died before 2014

- 57 younger than 65 years old

- 67 participants with self-reported dementia at baseline

- 818 with missing data on cognitive function or lifestyle

2506 participants survived to 2018

1461 participants died during 2014-2018

1157 participants lost to follow-up during 2014-2018

5124 participants were successfully followed-up and survived to 2014

Total 9765 participants from CLHLS survey in 2011

Figure S2. Associations of the MMSE scores with mortality stratified by lifestyles.


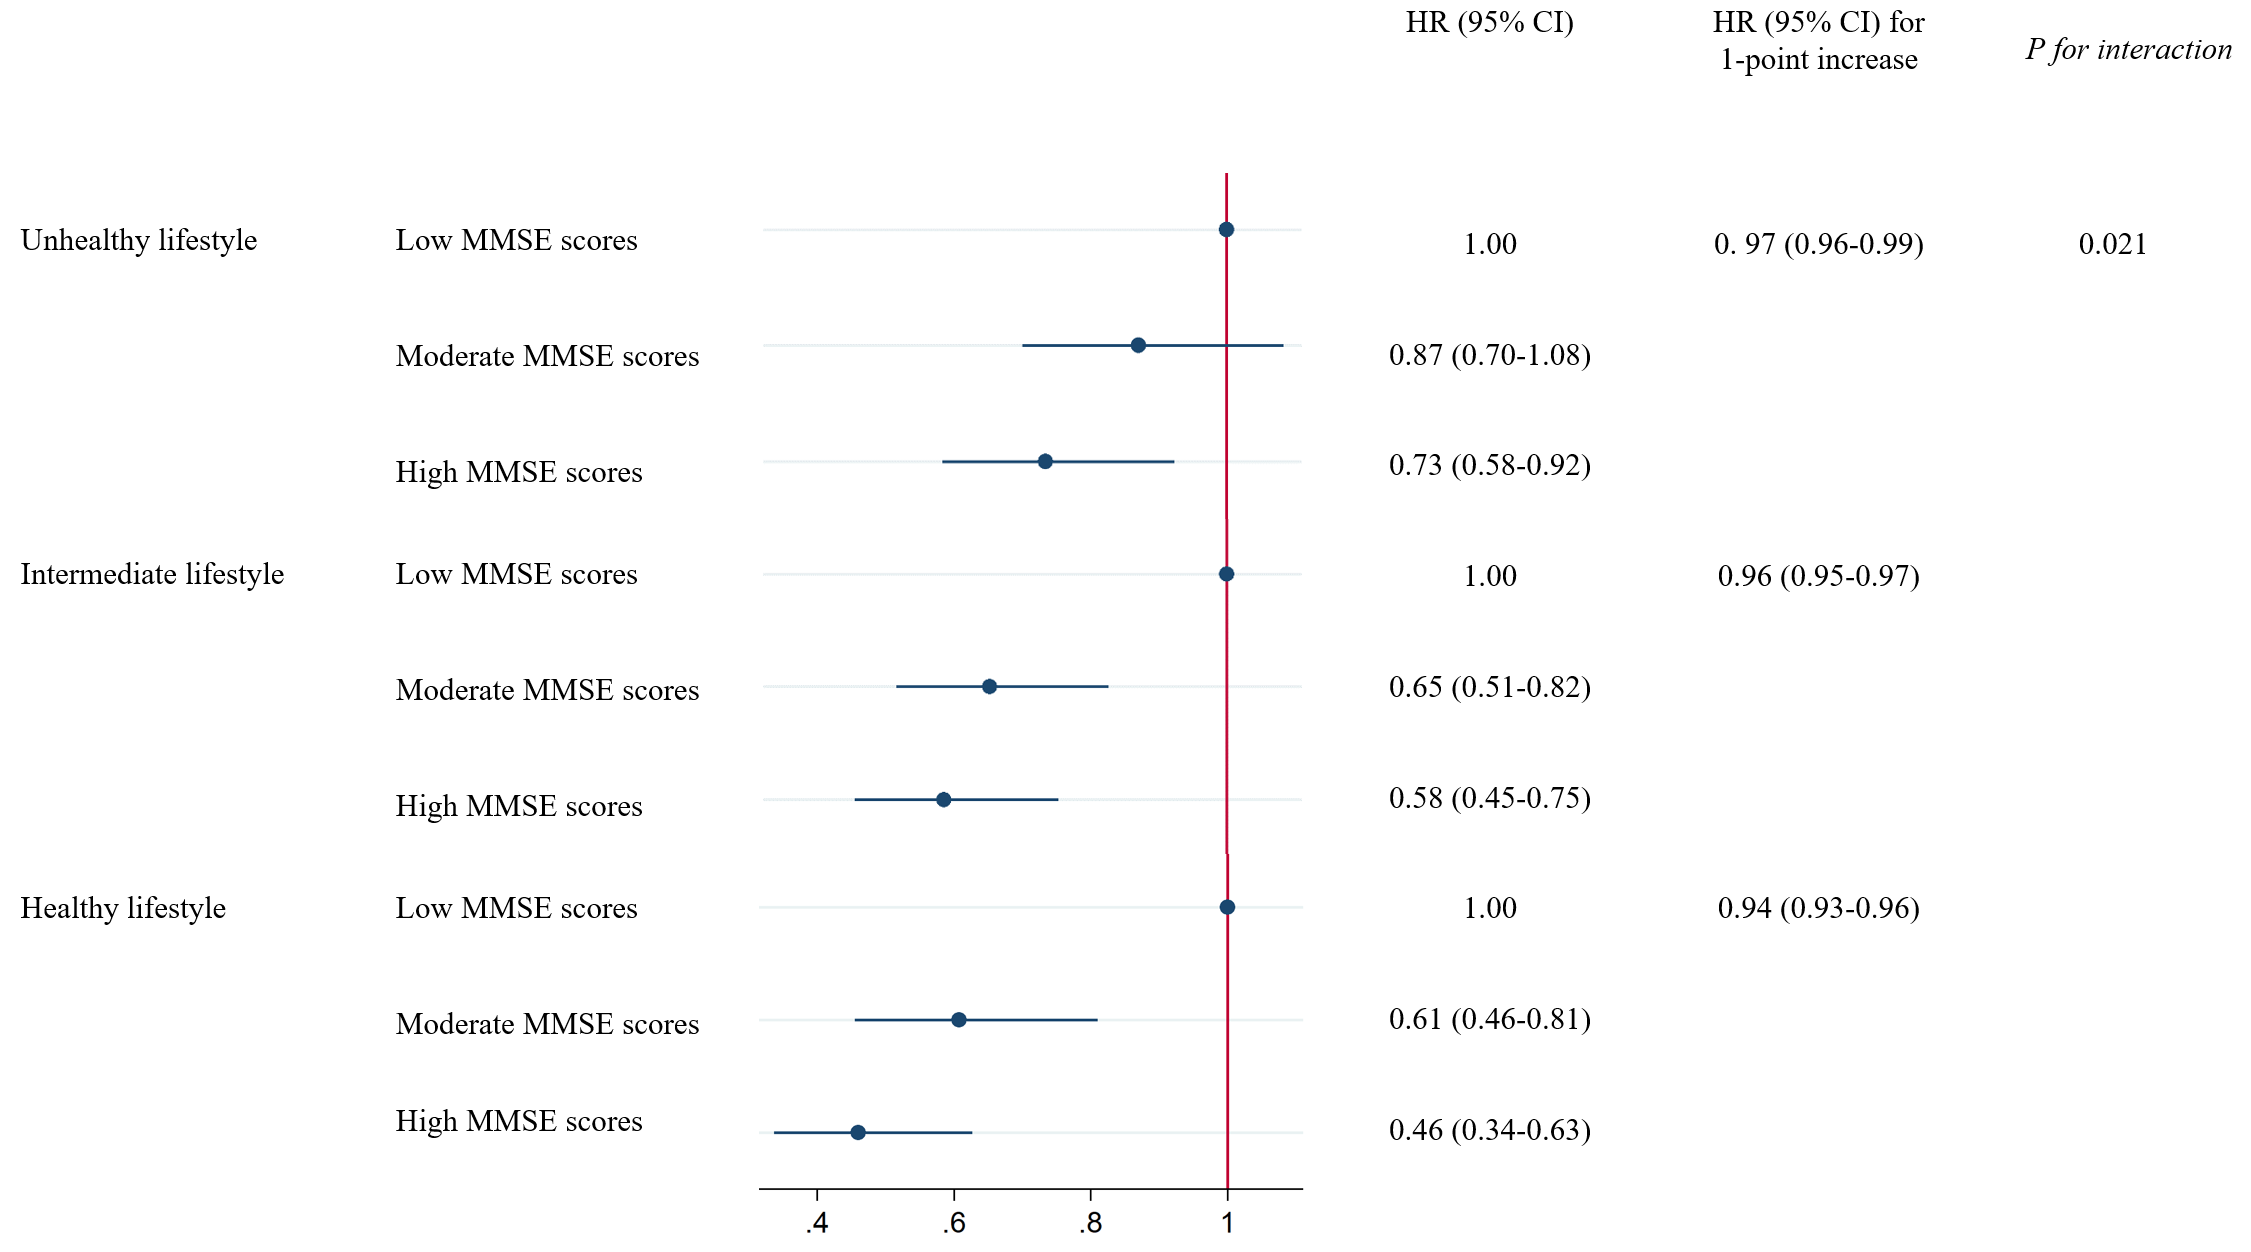


Figure 1—Associations between MMSE scores and all-cause mortality stratified by lifestyles. Results were adjusted for age, sex, education, residence, marital status, living pattern, self-rated of economic status, ADL in disability and history of chronic disease (diabetes, heart diseases, cancer and stroke). MMSE, Mini-Mental State Examination; HR, hazard ratio; CI, confidence interval.
